# Supplementary material for: Silver nanoparticles coated by green graphene quantum dots for accelerating the healing of MRSA-infected wounds
Source: Royal Society of Chemistry journal article supplement (doi:10.1039/d0bm01398f), 2020-01-01
Supplement: d0bm01398f1.pdf [file d0bm01398f1.pdf]

## Supporting Information

### Silver nanoparticles coated by green graphene quantum dots for accelerating healing of *MRSA*-infected wound

Xianghua Zhong<sup>#1</sup>, Chunyi Tong<sup>#2</sup>, Tiansheng Liu<sup>#1</sup>, Li Li<sup>2</sup>, Xu Liu<sup>3</sup>, Yuejun Yang<sup>\*1</sup>, Rushi Liu<sup>\*1</sup>, Bin Liu<sup>2</sup>

<sup>1</sup> School of Medicine, Hunan Normal University, Changsha, 410125, PR China

<sup>2</sup> College of Biology, Hunan University, Changsha, 410082, PR China

<sup>3</sup> School of Pharmacy, Hunan University of Chinese Medicine, Changsha 410208, China

<sup>#</sup> These authors contributed to the work equally and should be regarded as co-first authors.

<sup>\*</sup> To whom correspondence should be addressed.

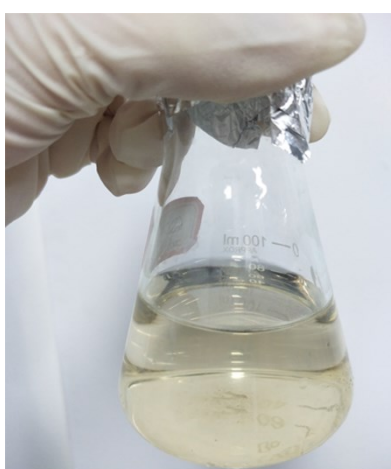

**Figure S1.** Photographs of graphene quantum dots (GQDs) solution synthesized by a facile and effective green method from natural polymer starch.

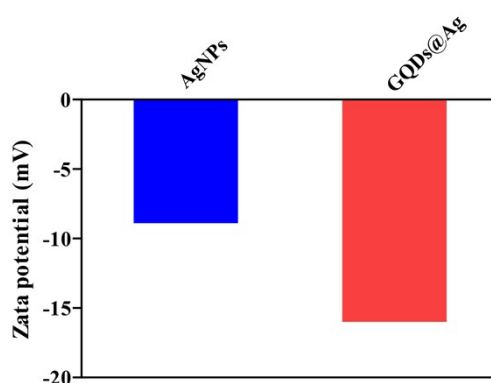

**Figure S2.** Zeta potential of AgNPs and GQDs@Ag.

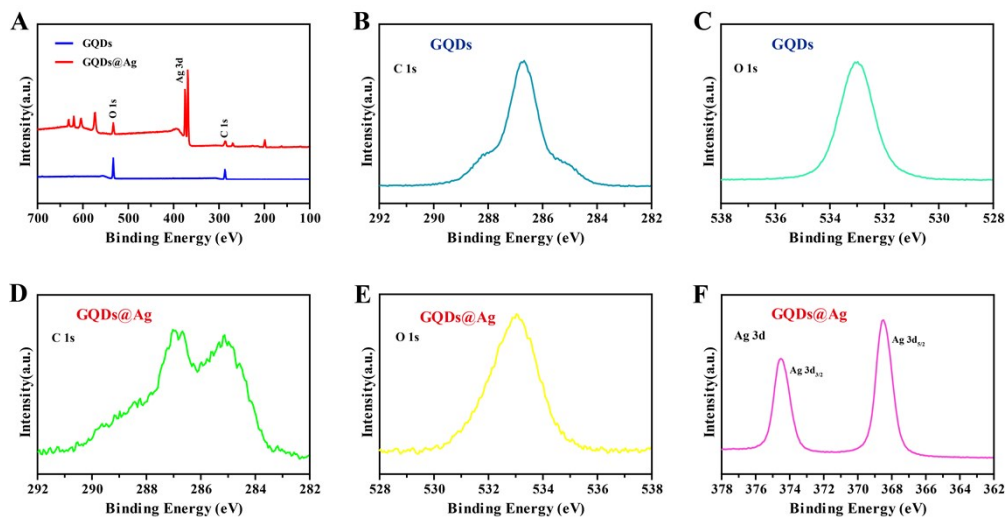

**Figure S3.** (A) XPS full scan spectra of GQDs (blue lines) and GQDs@Ag hybrids (red lines). High-resolution XPS spectra of (B) C 1s and (C) O 1s from GQDs. High-resolution XPS spectra of (D) C 1s, (E) O 1s and (F) Ag 3d from GQDs@Ag.

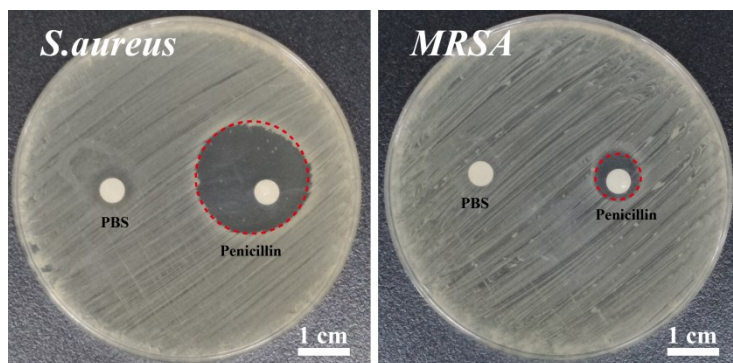

**Figure S4.** Photographs of inhibition zones of *S. aureus* and MRSA treated with penicillin (300 µg/mL) for 24 h.

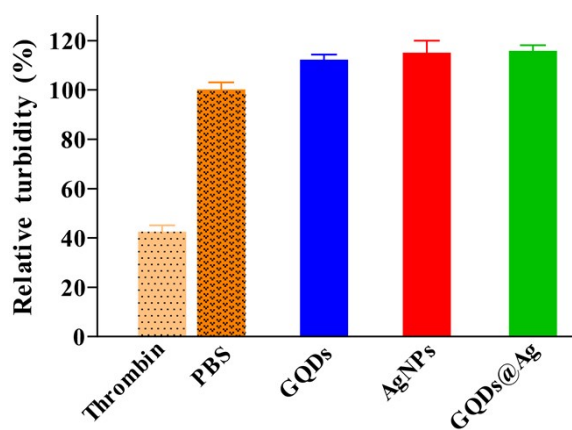

**Figure S5.** Platelet aggregation assay of GQDs, AgNPs and GQDs@Ag (20 µg/mL).

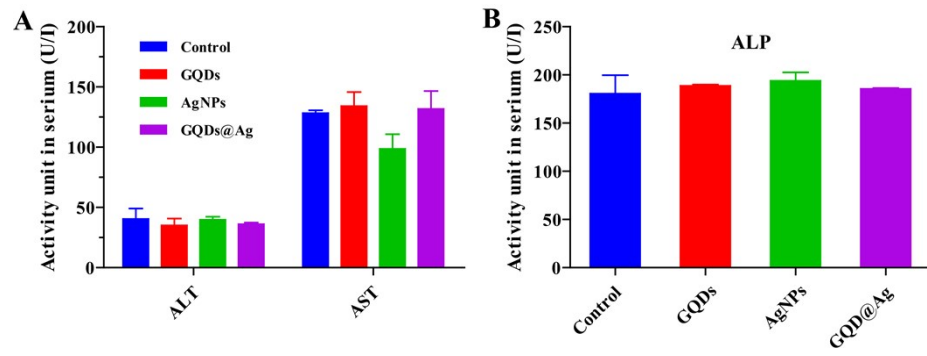

**Figure S6.** (A) ALT and AST level of the blood of each group of mice on the 10th day. (B) ALP level of the blood of each group of mice on the 10th day.
